# Supplementary material for: Non-imprinted allele-specific DNA methylation on human autosomes
Source: Springer Nature journal article supplement (doi:10.1186/gb-2009-10-12-r138), 2009-12-03
Supplement: Additional file 1 [file gb-2009-10-12-r138-s1.pdf]

## Non-imprinted allele-specific DNA methylation on human autosomes

Yingying Zhang, Christian Rohde, Richard Reinhardt, Claudia Voelcker-Rehage & Albert Jeltsch

**Additional data file 1: Detailed information of the amplicons analyzed and the correlated genes, genomic positions and primers used for bisulfite genomic sequencing.**

| Amplicon name | Chromosome | Strand | Start    | End      | Forward primer               | Reverse primer                |
|---------------|------------|--------|----------|----------|------------------------------|-------------------------------|
| 23_2          | 21         | +      | 14273754 | 14274179 | TGAGGGATGGAAAATAGTTGA        | AAACAAAAACRAAAAAATAAAAA       |
| 23_1          | 21         | -      | 14274136 | 14274505 | TAGGAATTTTGAAGTGGTAAGGTT     | AAAAAACAACTCCCTATCACCTTTT     |
| 140           | 21         | -      | 33319383 | 33319703 | GATGGTTTGGAGATTTTGTAGAGTT    | AATCCCTACCCCAACTAAAAA         |
| 158           | 21         | +      | 34367214 | 34367454 | TTGTTATGTTTGTATTTAGTTTT      | AAAATATTCAAAAACCCCTAC         |
| 176_1         | 21         | +      | 36364032 | 36364333 | TGTAAGTTAGGTTAGTTGGTTTTT     | ATACCCCTATTACCTCCAATCACC      |
| 176_2         | 21         | +      | 36364230 | 36364705 | GGGTTTGAGTTAGGTTTGTTTTTTA    | TCCAAAAATTTCTACTCCCTACAT      |
| 187           | 21         | +      | 36774786 | 36775091 | GGTTTGGGATTTTTTAAGGTATA      | AACACAAAAACCAAACTTTTAAATCC    |
| 197           | 21         | -      | 37562188 | 37562464 | TTGGGAATAAAAAATAAGGTAGATTATT | CAACTAAACCTAAAACCAAAATCTC     |
| 223           | 21         | +      | 41140973 | 41141244 | GAGTAGGGATTTTTTTTTTGT        | RAACATTTTCATTTTCCCTCTC        |
| 229           | 21         | -      | 41719790 | 41720129 | GTTTTTTAATGTTTTTTTT          | AAACACCTTAATCTCAAAC           |
| 232           | 21         | +      | 42059323 | 42059563 | GAATTTGAATGTAAGGTTTTTTTT     | AACACAAATTAATATAAAAATAAATTATT |
| 257           | 21         | +      | 43461221 | 43461648 | GGGAGTGTGGATATTTAGTGAGA      | TTCCAACACCTAAAAAACCCCTATA     |
| 262           | 21         | -      | 43902246 | 43902635 | TTGTAGATAAAGTTTAAAT          | AATCTCCAACTTCCCCCAAAA         |
| 283           | 21         | +      | 44700205 | 44700569 | TTTTTTTAGTGTGAAAGAAAAGG      | CATAACCAATAAATAATCACTAC       |
| 307           | 21         | +      | 45165207 | 45165481 | GGGGTTTTGTTATTAGTTTGT        | AACCCCTCCCAATATAAATCTA        |
| 335           | 21         | +      | 46849231 | 46849623 | GTTGTTAATGTTTTAAAGGGTTTT     | TCCTCAACCATATACAATCCTAAC      |

| Amplicon name | gene name | Description                                                                        | Length (bp) | CpG sites |
|---------------|-----------|------------------------------------------------------------------------------------|-------------|-----------|
| 23_1          | C21orf81  | chromosome 21 open reading frame 81                                                | 370         | 31        |
| 23_2          | C21orf81  | chromosome 21 open reading frame 81                                                | 426         | 26        |
| 140           | OLIG2     | oligodendrocyte lineage transcription factor 2                                     | 321         | 20        |
| 158           | MRPS6     | mitochondrial ribosomal protein S6                                                 | 241         | 31        |
| 176_1         | CBR1      | carbonyl reductase 1                                                               | 302         | 31        |
| 176_2         | CBR1      | carbonyl reductase 1                                                               | 476         | 44        |
| 187           | CLDN14    | claudin 14                                                                         | 241         | 10        |
| 197           | DSCR3     | Down syndrome critical region gene 3                                               | 272         | 22        |
| 223           | DSCAM     | Down syndrome cell adhesion molecule                                               | 321         | 12        |
| 229           | MX1       | myxovirus (influenza virus) resistance 1, interferon-inducible protein p78 (mouse) | 428         | 33        |
| 232           | RIPK4     | receptor-interacting serine-threonine kinase 4                                     | 241         | 25        |
| 257           | CRYAA     | crystallin, alpha A                                                                | 241         | 20        |
| 262           | HSF2BP    | heat shock transcription factor 2 binding protein                                  | 400         | 42        |
| 283           | LRRC3     | leucine rich repeat containing 3                                                   | 306         | 28        |
| 307           | ITGB2     | integrin, beta 2 (complement component 3 receptor 3 and 4 subunit)                 | 275         | 9         |
| 335           | S100B     | S100 calcium binding protein, beta (neural)                                        | 277         | 10        |

**Primers used for genomic DNA sequencing to identify the genotype and confirm the methylation difference between alleles.**

| Amplicon  | Forward Primer        | Reverse Primer        |
|-----------|-----------------------|-----------------------|
| 23_1/23_2 | GGTGGTGACTTCTCAGACTC  | GATCCGTGGCTGCACTATTC  |
| 262       | GCCGTTAGGGGAGGAAGTCT  | AAATTCTGGGAGGTTGGGC   |
| 232_A     | TTCAAGAACATTCTCCCTACC | AAGAAAAGCAGGGCAGCTGAT |
| 232_B     | TGACTTTTGGACTGGGAAAC  | TACGTTGGAACACAATTGG   |

Primers for 23\_1/23\_1 and 262 were used both for the identification of genotype and

confirmation of the methylation difference between alleles. Primers 232\_A were used to identify the genotype of gene RIPK4. Primers 232\_B were used to amplify the PCR products from genomic DNA with or without methylation sensitive restriction enzymes digestion.

### Primers for RT-PCR

| Amplicon  | Forward Primer         | Reverse Primer            | SNPs in exon |
|-----------|------------------------|---------------------------|--------------|
| 23_1/23_2 | TGGGGTTGGATAGGGGATTT   | CACTTTCTTGGGGACACACT      | rs56270809   |
| 262       | CTCTCTAGGCCGAGAATACTGC | TTCCAGATCCTTCTTTCTGACTTTA | rs2838343    |
| 232       | GGTGCGCCATGTCCACTGGAAG | CCGGAGATCCCATGGCAATGGC    | rs6586238    |

For amplicon 23\_1/23\_2 and 262, the SNPs analyzed in the amplicons are located in the exons of the genes, such that the SNPs were directly used to discriminate the alleles in gene expression analysis. For amplicon 232, SNP rs6586238 in the first exon of the gene was used to discriminate alleles and its correlation with the SNP rs55860816 in amplicon 232 was identified in genomic DNA.
